# Supplementary material for: Rethinking the role of transport and photochemistry in regional ozone pollution: Insights from ozone concentration and mass budgets
Source: Copernicus journal article supplement (doi:10.5194/egusphere-2022-1271), 2022-12-06
Supplement: Supplementary file [file egusphere-2022-1271-AC1-supplement.pdf]

## Response to Reviewer I

### General Comments:

- Understanding the processes controlling the O<sub>3</sub> concentration in a specific area is important to design emission reduction strategies to reduce the harmful effects of tropospheric O<sub>3</sub>. This paper focuses on two processes that take place in the O<sub>3</sub> cycle: transport and photochemistry.
- The paper discusses two methodological approaches to understand two O<sub>3</sub> processes (transport and photochemistry) which are the O<sub>3</sub> budget and the O<sub>3</sub> source apportionment. Authors claims that there is a contradictory view on the role of transport and photochemistry in O<sub>3</sub> pollution between the budget calculation studies and O<sub>3</sub> source apportionment studies, because both studies provide different information. In my point of view, they are two different approaches difficult to compare, so it is normal they provide different results. However, as the authors show in the paper it is possible to learn from the both of them.
- I think the paper is organized in a way that it does not help to understand its objective and methodology, even it shows a hard work behind. So, in my opinion, this manuscript was hard to follow and understand, and consequently to review. Furthermore, it could help if authors improve the readability of the text. Overall, there are too many pronouns and missing nouns that make difficult to follow the main idea of some sentences. Authors should review the text carefully and provide a more accurate reference to key concepts, also being consistent in the way they do it along the manuscript.

### Response:

We appreciate the valuable comments and suggestions. We've tried to adjust the structure of the paper and make a lot of revisions to improve its readability.

Before in-detail responses, we want to clarify the “contradictory” in this paper. Reported O<sub>3</sub> concentration budgets often show that photochemistry is the main process leading to the rapid increase of O<sub>3</sub> concentrations, but fail to explain why most O<sub>3</sub> in the region is transported from the outside regions, as suggested by O<sub>3</sub> source apportionment. It indicates that the O<sub>3</sub> concentration budget cannot completely illustrate the effects of transport and photochemistry on regional O<sub>3</sub> pollution. By calculating, analysing and comparing the O<sub>3</sub> concentration and mass budget, this study aims to comprehensively understand the role of transport and photochemistry in regional O<sub>3</sub> pollution.

The contents of this paper includes:

- 1) Development of the method to quantify the two O<sub>3</sub> budgets (Sect. 2.1-2.3);
- 2) Analysis and comparison of the results from the two O<sub>3</sub> budgets (methodology described in Sect. 2.5, results discussed in Sect. 3);
- 3) Assessment of the role of transport and photochemistry in determining the regional origins of O<sub>3</sub> (methodology described in Sect. 2.6, result presented in Sect. 4).

Results show that photochemistry dominates the changes of O<sub>3</sub> concentrations, or plays a major role in the O<sub>3</sub> concentration budget. Although transport only leads to limited changes of O<sub>3</sub> concentrations, its large contributions in the O<sub>3</sub> mass budget ensure that it determines the characteristics of O<sub>3</sub> pollution, e.g., the regional origins of O<sub>3</sub> in this study. Based on the conclusions, we suggest the insights from both concentration and mass budgets are necessary to comprehensively understand the role of transport and

chemistry in regional O<sub>3</sub> pollution. Suggestions based on the two O<sub>3</sub> budgets are also provided for policy-makers when making strategies to alleviate O<sub>3</sub> pollution.

Our responses to specific comments and corresponding revisions are as follows (in blue and red, respectively). Note that line numbers are these in the revised manuscript with author's changes.

**Specific comments:**

1) Abstract: difficult to get the important of the problem from the four first lines.

**Response:**

We revised the first four lines in the Abstract as (in lines 20-24):

Understanding the role of transport and photochemistry is essential to mitigate tropospheric ozone (O<sub>3</sub>) pollution within a region. In previous studies, the O<sub>3</sub> concentration budget has been widely used to determine the contributions of two processes to the variations of O<sub>3</sub> concentrations. These studies often conclude that local photochemistry is the main cause of regional O<sub>3</sub> pollution; however, they fail to explain why O<sub>3</sub> in a targeted region is primarily derived from O<sub>3</sub> and/or its precursors transported from the outside regions as reported by many studies of O<sub>3</sub> source apportionment.

2) The abstract does not help to understand the objective and the methodology approach. Ozone budget calculation and O<sub>3</sub> source apportionment studies seem two different types of approaches difficult to compare, so it is normal they provide different results.

**Response:**

We agree that different methods can give different results, but it is also important to know why they are different. For this study, the O<sub>3</sub> concentration budget fails to explain why most O<sub>3</sub> is transported from the outside regions, suggesting that this method cannot completely illustrate the effects of transport and photochemistry on regional O<sub>3</sub> pollution. By calculating, analysing and comparing the O<sub>3</sub> concentration and mass budgets, this study not only more comprehensively reveals the role of transport and photochemistry in regional O<sub>3</sub> pollution, but also clarifies the connections between O<sub>3</sub>-related processes and the characteristics of O<sub>3</sub>, i.e. the regional origins of O<sub>3</sub> in this study.

To make a clearer introduction, we revised the objective and the methodology in the abstract, shown in lines 27-32:

Here, we present a method to calculate the hourly contributions of O<sub>3</sub>-related processes to the variations of not only the mean O<sub>3</sub> concentration, but also the total O<sub>3</sub> mass (the corresponding budgets are noted as the O<sub>3</sub> concentration and mass budget, respectively) within the atmospheric boundary layer (ABL) of the concerned region. Based on the modelling results of WRF-CMAQ, the two O<sub>3</sub> budgets were applied to comprehensively understand the effects of transport and photochemistry on the O<sub>3</sub> pollution over the Pearl River Delta (PRD) region in China.

3) Line 29: you mention two budgets, but you have not introduced them in the abstract. Is that related with the two types of studies?

**Response:**

Two budgets are introduced in lines 27-31:

Here, we present a method to calculate the hourly contributions of O<sub>3</sub>-related processes to the variations of not only the mean O<sub>3</sub> concentration, but also the total O<sub>3</sub> mass (the corresponding budgets are noted as the O<sub>3</sub> concentration and mass budget, respectively) within the atmospheric boundary layer (ABL) of the concerned region.

The O<sub>3</sub> mass budget is used to explain the results of O<sub>3</sub> source apportionment. According to the discussions in Sect. 4 of this paper, transport and photochemistry determine the regional origins of O<sub>3</sub> by influencing their contributions in the O<sub>3</sub> mass budget as well as the regional origins of O<sub>3</sub> mass attributed to these O<sub>3</sub>-related processes.

4) Line 74: the subject of that sentence “O<sub>3</sub> source” does not make sense. Could you elaborate more the idea in that sentence.

**Response:**

We agree that “O<sub>3</sub> source” might be a confusing item for the readers. Here, “O<sub>3</sub> source” was used to indicate the regional origins of O<sub>3</sub>, or how much the concerned regions contribute to O<sub>3</sub> pollution. We revised the sentence into (in lines 107-111):

O<sub>3</sub> source apportionment is performed to identify the regional and/or sectoral origins of O<sub>3</sub>, of which the results are also used to support air pollution control (Clappier et al., 2017; Thunis et al., 2019). Here, we only discuss the regional origins of O<sub>3</sub>, because the contributions of sources outside the region (or emissions within the region, defined as local emissions hereafter) provide information on the influence of transport (or photochemistry) on O<sub>3</sub> pollution.

We also revised other “O<sub>3</sub> sources” in the manuscript into “the results of O<sub>3</sub> source apportionment”, “regional origins of O<sub>3</sub>” or alike items.

5) Line 88: “O<sub>3</sub> source studies”. Use the same set of words to mention these studies. I guess in this case you want to say “O<sub>3</sub> source apportionment studies”. The same comment in lines 90-91, “source apportionment studies” and “O<sub>3</sub> budget studies”.

**Response:**

We accept your suggestion. However, the two sentences mentioned in the comment were deleted in the revised version. For the similar expressions afterwards, we revised them into “O<sub>3</sub> source apportionment studies”, “O<sub>3</sub> concentration budget studies” or alike items.

6) Line 93: “CTM are capable of reproducing O<sub>3</sub> processes”. In this sentence, you are attributing too much credibility to CTM, but models are not perfect and not always reproduce all the processes. I would be more realistic with what CTM can do, so I would suggest to rewrite this sentence.

**Response:**

Thanks for your suggestion. The expression here is inaccurate. In the revised manuscript, this sentence was deleted.

7) Lines 93-103 is specifically to CMAQ, it does not apply to any Eulerian CTMS (i.e. not CTM has a PA module).

**Response:**

Accepted. In the revised manuscript, we pointed out that the method is applied to budget calculations based on WRF-CMAQ results, as shown in lines 173-174:

WRF-CMAQ employs the Process Analysis (PA) module to assess the contributions of O<sub>3</sub>-related processes to the variations of O<sub>3</sub> concentrations within each grid cell.

8) Line 121: “Horizontal transport through the borders of the PRD in four directions”. Is that correct? I guess you have two horizontal directions (x and y).

**Response:**

We did not state it clearly. The borders of the PRD were classified as the north, south, west, east border. Horizontal transport through four types of the PRD borders were separately quantified in O<sub>3</sub> budgets. Thus, we added more explanations about the classification of border (grid) in lines 199-201:

The PRD grids with one or several interfaces with the outer regions are defined as the border grids, and they can be further classified as the grids in the north, south, west and east borders based on their locations.

and also revised the expressions about the horizontal transport processes in lines 204-205:

The transport processes include horizontal transport through the four types of borders and vertical exchange through the ABL top.

9) Section 2.5 Model setup and validation. Even the model setup is described in the Qu et al. (2021) some basic details should be provided in the text, for example CMAQ and WRF version. Furthermore, the section is named “validation”. You mainly referenced Qu et al. (2021) but readers would appreciate a paragraph describing “why” we can trust on your modeling system’s results. The evaluation of ABL height with IAGOS measurements is very interesting. Could you elaborate more on the problems with CMAQ during the night?

**Response:**

We agreed that it is necessary to provide more details on model setup, thus relative contents were added in lines 334-352:

The WRF (version 3.2) and CMAQ (version 5.0.2) models were used to simulate the meteorological and pollutant fields, respectively. Two domains with the resolution of 36 and 12 km (denoted as d01 and d02 hereafter) were set up for the one-way nested simulations, and results in the finer d02 were used in the calculations of O<sub>3</sub> budgets. To represent the contributions of global background to O<sub>3</sub>, the initial and

boundary conditions for the coarse d01 domain were provided from the global model, the Model for Ozone and Related Chemical Tracers, version 4 (MOZART-4). The PRD inventory provided by the Guangdong Environmental Monitoring Centre, the Multi-resolution Emission Inventory for China (MEIC) inventory for the mainland China (He, 2012), the MIX inventory for the Asian regions outside of mainland China (Li et al., 2017) and biogenic emissions simulated by the Model of Emissions of Gases and Aerosols from Nature (MEGAN; version 2.10) model were used in the simulations. SAPRC07 (Carter, 2010) and AERO6 were applied as the gas-phase chemistry mechanism and the aerosol scheme, respectively. The simulations of O<sub>3</sub> pollution in the PRD were performed for October 2015 (October 11–November 10, 2015) and July 2016 (July 1–31, 2016), which were selected as the representative months in autumn and summer, respectively. Here, O<sub>3</sub> polluted days are defined when the maximum hourly O<sub>3</sub> concentrations of the day exceed 200 µg/m<sup>3</sup>, or the maximum 8-hour average O<sub>3</sub> concentrations of the day exceed 160 µg/m<sup>3</sup> (both are the Grade-II O<sub>3</sub> thresholds in the Chinese National Ambient Air Quality Standard) in any municipality of the PRD. According to this definition, there were 16 and 12 O<sub>3</sub> polluted days in the two months, respectively (more information is given in Table S1). The mean O<sub>3</sub> budgets during these days were calculated and discussed in the present study.

As for the validation, we agreed that the relative discussions were limited in this part. Thus, we gave more information on:

1) the validation of meteorological parameters, O<sub>3</sub>, NO<sub>2</sub> concentrations and the mixing ratios of hydrocarbons by Qu et al. (2021);

2) the validation of atmospheric boundary layer height, wind speed, direction and ozone mixing ratio at different heights described in detail in Text S3

in a new paragraph, as shown in lines 354-369:

We evaluated the performance of WRF-CMAQ modelling based on multiple observational datasets. The modelling results of meteorological parameters (including temperature, relative humidity and wind speed), O<sub>3</sub>, NO<sub>2</sub> concentrations and the mixing ratios of hydrocarbons were validated with corresponding observations in the PRD by Qu et al. (2021a). The performance of the model to simulate the above variables was overall satisfying with low biases and high correlations (for details, see Qu et al., 2021a). In this study, we further compared the modelled ABL height, the vertical profiles of wind speed, direction and O<sub>3</sub> mixing ratio in Hong Kong (located in the south PRD) with the corresponding observations from the IAGOS (In-service Aircraft for a Global Observing System; Petzold et al., 2015) dataset. The modelled ABL heights showed similar hourly variations during the day as the observational results ( $R = 0.76$ ), with mean bias of -1.1 m (Fig. S2). The mean biases of mean wind speeds are within the range of  $\pm 1$  m/s in all height ranges (0-1 km, 1-2 km, 2-5 km), and the results of IAGOS and WRF model indicate similar variations of prevailing wind directions in different seasons and height ranges (Fig. S3). Moreover, modelled O<sub>3</sub> mixing ratios in Oct. 2015 are overestimated by 6% and 26% in the height range of 0-1 km and 1-2 km, respectively, and sufficiently illustrate the development, maintenance and dissipation of O<sub>3</sub> pollution during the month (Fig. S4). More detailed evaluations on the model performance of these parameters are presented in Text S3 of the Supplement. Overall, the model performance is acceptable, indicating that the model can provide reasonable data for the calculations of O<sub>3</sub> budgets.

In this study, we evaluated the modelling performance of atmospheric boundary layer (ABL) height based on the IAGOS potential temperature profiles during daytime, but not at night. One reason is that in Oct.

2015, night-time records are less ( $30/105 = 28.6\%$ ) due to reduced flights at night. Besides, by using potential temperature profiles to determine night-time stable ABL height, large errors may occur (Dai et al., 2014). In order to have more precise O<sub>3</sub> budgets, more concerns on night-time ABL height are surely needed in further observations and model validation.

10) Line 220: “acceptable” from which point of view?

**Response:**

In this part, we evaluated the modelling performance of atmospheric boundary layer height, wind speeds, directions and O<sub>3</sub> mixing ratios at different heights. The results are summarized as follows:

- The modelled ABL heights showed similar hourly variations during the day as the observational results ( $R = 0.76$ ), with mean bias of -1.1 m.
- The mean biases of mean wind speeds are within the range of  $\pm 1$  m/s in all height ranges (0-1 km, 1-2 km, 2-5 km), and the results of IAGOS and WRF model indicate similar variations of prevailing wind directions in different seasons and height ranges.
- Modelled O<sub>3</sub> mixing ratios in Oct. 2015 are overestimated by 6% and 26% in the height range of 0-1 km and 1-2 km, respectively, and sufficiently illustrate the development, maintenance and dissipation of O<sub>3</sub> pollution during the month.

High correlations and low biases of these parameters ensures that the modelling results can be used for further analyses, thus they are “acceptable”.

According the comment No. 9, relative results are described in the revised manuscript, in lines 354-369.

11) Line 221: “reasonable” from which point of view?

**Response:**

This question is similar as the last one. The good performance of key parameters indicates that the modelling results are close to these in reality, thus they are “reasonable” for further usage in O<sub>3</sub> budget calculations.

12) Line 236-237: Is that sentence well written?

**Response:**

We revised the sentence into (in lines 387-391):

The question to be addressed is how O<sub>3</sub>-related processes determine the regional origins of O<sub>3</sub>. By combining the O<sub>3</sub> mass budget calculations with the BFM source apportionment method, we identified the regional origins of O<sub>3</sub> mass changes due to transport and photochemistry (gas-phase chemistry).

13) Source apportionment method: Could you comment on the brute force disadvantages for O<sub>3</sub> source apportionment calculation? Could CMAQ-ISAM source apportionment method improve your results?

**Response:**

For this part of the study, the goal is to identify the regional origins in the O<sub>3</sub> mass changes attributed to transport and gas-phase chemistry (photochemistry). Besides the base scenario, three sensitivity scenarios need to be simulated in the Brute Force Method (BFM), which means increased simulation cost. But the regional source contributions in the O<sub>3</sub> mass changes attributed by non-transport processes, including gas-phase chemistry (photochemistry), can be identified. As a tagging method, the ISAM module in CMAQ can be used to identify the regional origins in the O<sub>3</sub> mass changes attributed to transport by using O<sub>3</sub> concentrations contributed by various regions in calculations. The simulation costs can be reduced, since it is not needed to simulate three sensitivity scenarios. However, as far as we acknowledge, the results for gas-phase chemistry (photochemistry) cannot be provided by the ISAM.

14) Conclusions: “This study concluded that transport and gas-phase chemistry play the main role in the O<sub>3</sub> concentration and mass budgets”. Is it not new, right? Could you elaborate more this sentence as the main conclusion of this work.

**Response:**

Main conclusions of this study are given in the first paragraph of Sect. 5. This paragraph aims to discuss the application of O<sub>3</sub> budgets in the practice of O<sub>3</sub> pollution control. As the first sentence, this sentence fails to start the afterward discussions, thus was revised as (in lines 726-728):

The present study concluded that transport and gas-phase chemistry play the main role in the O<sub>3</sub> mass and concentration budgets, respectively. As a consequence of our assessment, what should policy-makers do to effectively alleviate regional O<sub>3</sub> pollution?

15) Conclusions: Could you elaborate more in the biases in your modelling results? For example, discussing the uncertainties in your emission data, meteorological fields, chemical and meteorological boundary conditions, chemistry in the models.

**Response:**

Emissions, meteorological fields, chemical and meteorological boundary conditions, chemistry and many other factors in models could all influence the results of two O<sub>3</sub> budgets. However, this study focuses on the comparison between two O<sub>3</sub> budgets to provide a complete view on the role of transport and photochemistry in regional O<sub>3</sub> pollution. To have more precise O<sub>3</sub> budgets, we suggest to conduct more supporting observations and have more comparisons between observational and modelling results. Specifically, the observational and modelling contributions by various O<sub>3</sub>-related processes in the O<sub>3</sub> budgets can be directly compared. Such results are important for further model development because it indicates which process contribute to high uncertainties in O<sub>3</sub> modelling. Relative contents are discussed in the Sect. 5, in lines 717-724.

Uncertainty remains in the calculated O<sub>3</sub> budgets, which is partly related to the biases in the modelling results. Therefore, supporting observations are essential for future research. Recent progress in observational techniques (Zhao et al., 2021; Zhou et al., 2021) has enabled three-dimensional measurements of meteorological parameters and O<sub>3</sub> concentrations with high spatiotemporal resolution and coverage. These data can be used not only for the model validation of key parameters in budget calculations, but also for the comparisons between observation- and modelling-based contributions by

various O<sub>3</sub>-related processes in O<sub>3</sub> budgets (Kaser et al., 2017). The comparison of contributions by O<sub>3</sub>-related processes is indicative of the main uncertainties in O<sub>3</sub> pollution modelling, and is therefore also important for further model developments.

**Technical corrections:**

1) Line 93: CTM not defined

**Response:**

This sentence containing “CTM” was deleted in the revised manuscript.

2) Line 95: PA module not defined.

**Response:**

Revised accordingly in line 173:

WRF-CMAQ employs the Process Analysis (PA) module to assess the contributions of O<sub>3</sub>-related processes...

3) I would suggest used “tropospheric ozone” instead of “ambient O<sub>3</sub>” when possible.

**Response:**

We agreed that to avoid confusion with ozone in stratosphere, “tropospheric ozone” is a better term to be used. It was revised accordingly in line 47-49:

Since first recognized as a key contributor to the Los Angeles smog, tropospheric ozone (O<sub>3</sub>) pollution has received considerable attentions in many highly populated areas in the world...

Afterwards, “O<sub>3</sub>” is directly used for relative discussions.

**Additional statement:**

Due to their strong professionalism in the areas of atmospheric pollution and modelling as well as high involvement in revising this paper, we are honoured to add Maria Kanakidou and Guy Brasseur as co-authors of this paper.

**References**

Carter, W. P. L.: Development of the SAPRC-07 chemical mechanism, Atmos. Environ., 44, 5324–5335, <https://doi.org/10.1016/j.atmosenv.2010.01.026>, 2010.

Clappier, A., Belis, C. A., Pernigotti, D., and Thunis, P.: Source apportionment and sensitivity analysis: two methodologies with two different purposes, Geosci. Model Dev., 10, 4245–4256, <https://doi.org/10.5194/gmd-10-4245-2017>, 2017.



Dai, C., Wang, Q., Kalogiros, J. A., Lenschow, D. H., Gao, Z., and Zhou, M.: Determining Boundary-Layer Height from Aircraft Measurements, *Bound.-Lay. Meteorol.*, 152, 277–302, <https://doi.org/10.1007/s10546-014-9929-z>, 2014.

He, K.: Multi-resolution Emission Inventory for China (MEIC): model framework and 1990-2010 anthropogenic emissions, American Geophysical Union, Fall Meeting 2012, 3–7 December 2012, San Francisco, USA, A32B-05, 2012.

Kaser, L., Patton, E. G., Pfister, G. G., Weinheimer, A. J., Montzka, D. D., Flocke, F., Thompson, A. M., Stauffer, R. M., and Halliday, H. S.: The effect of entrainment through atmospheric boundary layer growth on observed and modeled surface ozone in the Colorado Front Range, *J. Geophys. Res.-Atmos.*, 122, 6075–6093, <https://doi.org/10.1002/2016JD026245>, 2017.

Li, M., Zhang, Q., Kurokawa, J.-I., Woo, J.-H., He, K., Lu, Z., Ohara, T., Song, Y., Streets, D. G., Carmichael, G. R., Cheng, Y., Hong, C., Huo, H., Jiang, X., Kang, S., Liu, F., Su, H., and Zheng, B.: MIX: a mosaic Asian anthropogenic emission inventory under the international collaboration framework of the MICS-Asia and HTAP, *Atmos. Chem. Phys.*, 17, 935–963, <https://doi.org/10.5194/acp-17-935-2017>, 2017.

Petzold, A., Thouret, V., Gerbig, C., Zahn, A., Brenninkmeijer, C. A. M., Gallagher, M., Hermann, M., Pontaud, M., Ziereis, H., Boulanger, D., Marshall, J., Nédélec, P., Smit, H. G. J., Friess, U., Flaud, J.-M., Wahner, A., Cammas, J.-P., Volz-Thomas, A. and IAGOS TEAM: Global-scale atmosphere monitoring by in-service aircraft—current achievements and future prospects of the European Research Infrastructure IAGOS, *Tellus B*, 67, 28452, <https://doi.org/10.3402/tellusb.v67.28452>, 2015.

Qu, K., Wang, X., Yan, Y., Shen, J., Xiao, T., Dong, H., Zeng, L., and Zhang, Y.: A comparative study to reveal the influence of typhoons on the transport, production and accumulation of O<sub>3</sub> in the Pearl River Delta, China, *Atmos. Chem. Phys.*, 21, 11593–11612, <https://doi.org/10.5194/acp-21-11593-2021>, 2021.

Thunis, P., Clappier, A., Tarrason, L., Cuvelier, C., Monteiro, A., Pisoni, E., Wesseling, J., Belis, C. A., Pirovano, G., Janssen, S., Guerreiro, C., and Peduzzi, E.: Source apportionment to support air quality planning: Strengths and weaknesses of existing approaches, *Environ. Int.*, 130, 104825, <https://doi.org/10.1016/j.envint.2019.05.019>, 2019.

Zhao, R., Hu, Q., Sun, Z., Wu, Y., Xing, C., Liu, H., and Liu, C.: Review of space and ground integrated remote sensing for air pollutants (in Chinese). *Res. Environ. Sci.*, 34(1), 28-40. <https://doi.org/10.13198/j.issn.1001-6929.2020.11.25>, 2021.

Zhou, B., Zhang, S., Xue, R., Li, J., and Wang, S.: A review of Space-Air-Ground integrated remote sensing techniques for atmospheric monitoring, *J. Environ. Sci.*, <https://doi.org/10.1016/j.jes.2021.12.008>, 2021.
